# Supplementary material for: Unraveling Gene Fusions for Drug Repositioning in High-Risk Neuroblastoma
Source: Front Pharmacol. 2021 Apr 23;12:608778. doi: 10.3389/fphar.2021.608778 (PMC8105087; doi:10.3389/fphar.2021.608778)
Supplement: Supplementary file 8 [file table4.xlsx]

## Sheet: ChimeraScan
Fusion names
AK308561_BC080605
HNRNPD_HNRPDL
GAS5_SNORD79
SNORD87_U87HG
'"SERF1_SERF1A"
AK093551_AK311131
GTPBP8_RPL41
EIF4A1_SNORA67
DKFZp566L241_SNORA63
HNRPD_HNRPDL
AF290475_BC037783
MCM4_TCL6e1
NOP56_SNORD57
NOP56_SNORD56
BC033961_KIF5A
MCM4_TCL6d1
MCM4_TCL6a1
LOC389527_UPLP
LOC389527_RASA4
DQ786274_FAM115A
SERF1_SERF1
NOL5A_SNORD56
C11orf68_WASH1
FLJ25037_KSR1
CR627093_KIAA0369
C11orf68_DKFZp434K1323
NSUN5C_PPHLN1
DKFZp781D1727_RGS7BP
GLTSCR1_STMN3
LOC389527_POLR2J3
RPS27_WWC3
KIAA1280_RPS27
LOC389527_POLR2J2
SNORA25_TAF1D
NSUN5B_PPHLN1
AK095450_FER
SERF1_SERF1B
NOL5A_SNORD57

## Sheet: SOAPfuse
Fusion names
AMH_SF3A2
CTBS_GNG5
DDX56_TMED4
C2orf48_RRM2
ADCK4_NUMBL
ENSG00000213930_IL11RA
NEFH_RFPL1
C1QTNF9B_MIPEP
ADSL_SGSM3
GALT_IL11RA
CLSTN1_CTNNBIP1
EPHX1_SRP9
NDUFA6-AS1_SMDT1
PAQR6_SMG5
STYXL1_TMEM120A
EHBP1L1_SSSCA1
CYB5R4_RIPPLY2
LINC00843_TIMM23B
PDCD7_UBAP1L
AACSP1_ZNF354A
ABCB8_ASIC3
MC1R_TCF25
ACTL6B_TFR2
COLQ_HACL1
EHBP1L1_FAM89B
C19orf24_CIRBP

## Sheet: TopHat
Fusion name
IGLL5_IGLV1-40
PACRG_PACRG-AS1
FAM89A_RNF4
ST7-AS1_ST7-AS2
PTEN_PTENP1
IGLL5_IGLV3-21
STIP1_STIP1P3
CASC4_MRPS31P2
GAPDH_GAPDHP65
NTM_OPCML
BMS1P20_IGLL5
PCDHA12_PCDHA2
CDH13_CDH13
NOC2L_NOC2LP1
GNAQ_GNAQP1
HDAC2-AS2_LOC101927768
IRAK3_RBMS1
EIF3E_KHDC1
NCAM1_NCAM1-AS1
HNRNPK_HNRNPKP1
IGLL5_IGLV2-14
SCAF8_TIAM2
RPL30_RPL30P4
CCNJL_UQCRB
NEBL_NEBL
NREP-AS1_STARD4-AS1
DNAJA1_DNAJA1P3
LDHB_LDHBP2
ABLIM1_LOC101927692
ANGPT2_MCPH1-AS1
ENSG00000234297_PSIP1
