# Supplementary material for: Unraveling Gene Fusions for Drug Repositioning in High-Risk Neuroblastoma
Source: Front Pharmacol. 2021 Apr 23;12:608778. doi: 10.3389/fphar.2021.608778 (PMC8105087; doi:10.3389/fphar.2021.608778)
Supplement: Supplementary file 10 [file table5.xlsx]

## Sheet: SOAPfuse
Category	Term	Count	%	PValue	Genes	List Total	Pop Hits	Pop Total	Fold Enrichment	Bonferroni	Benjamini
KEGG_PATHWAY	hsa03010:Ribosome	59	6.02041	3.34389e-37	RPL18, RPL36A, RPL14, RPL13, RPLP2, RPL22L1, RPS2, RPS3, RPS3A, RPLP0, RPLP1, RPL10, RPL12, RPL35A, RPS4X, RPS18, RPS19, RPS16, RPL41, RPS17, RPS14, RPS15, RPS13, RPS10, RPS11, RPL35, RPL27A, RPS15A, RPL36, RPL37, RPL38, RPL39, MRPL11, RPS25, RPS27, RPS28, RPS29, RPL32, RPL31, RPL34, RPL9, RPL7A, RPS20, RPS21, RPS23, RPS24, RPSA, RPS9, RPL24, RPS6, RPS5, RPL28, RPS7, RPL29, MRPL21, RPL23, RPL18A,…	396	136	6910	7.57	8.56036e-35	8.56036e-35
KEGG_PATHWAY	hsa04110:Cell cycle	30	3.06122	3.59937e-11	E2F1, E2F3, DBF4, PKMYT1, TTK, CHEK1, PTTG1, CHEK2, CDC45, CDKN2A, BUB1, ORC6, CCNA2, CDC6, CDK1, ESPL1, CDC20, MCM2, CDK4, CDC25C, CDC25A, MCM5, MCM6, CCNB1, MAD2L1, CCNB2, PLK1, PCNA, BUB1B, MDM2	396	124	6910	4.22165	9.2144e-09	4.6072e-09
KEGG_PATHWAY	hsa04914:Progesterone-mediated oocyte maturation	17	1.73469	2.67897e-05	CDK1, ADCY1, GNAI1, CPEB4, PIK3CD, PKMYT1, MAPK11, CDC25C, CDC25A, CCNB1, MAD2L1, CCNB2, PLK1, INS, BUB1, PRKACB, CCNA2	396	87	6910	3.40967	0.00683479	0.00228347
KEGG_PATHWAY	hsa03030:DNA replication	10	1.02041	0.000140663	RFC4, POLE2, POLD1, PCNA, MCM2, POLA2, RNASEH2A, MCM5, FEN1, MCM6	396	36	6910	4.84708	0.0353716	0.00896268
KEGG_PATHWAY	hsa04114:Oocyte meiosis	17	1.73469	0.000423796	CDK1, ADCY1, CPEB4, PKMYT1, AURKA, CDC20, ESPL1, PTTG1, CDC25C, MAD2L1, PLK1, INS, FBXO43, BUB1, FBXO5, CAMK2B, PRKACB	396	109	6910	2.72148	0.102834	0.0214691
KEGG_PATHWAY	hsa05166:HTLV-I infection	27	2.7551	0.00291688	E2F1, ADCY1, E2F3, TLN2, CHEK1, PTTG1, CHEK2, MYBL2, VCAM1, WNT4, CDKN2A, POLE2, PRKACB, ZFP36, SLC25A5, SLC25A6, PIK3CD, CDC20, FZD2, CDK4, HLA-DQA2, HLA-DQA1, MAD2L1, POLD1, PDGFRA, PCNA, BUB1B	396	256	6910	1.84038	0.526599	0.117181
KEGG_PATHWAY	hsa00240:Pyrimidine metabolism	14	1.42857	0.0060549	UPP1, POLA2, TK1, NME4, TYMS, POLE2, NME1-NME2, NME1, POLD1, RRM2, RRM1, ENTPD3, DPYD, DCTPP1	396	104	6910	2.34897	0.788761	0.199172
KEGG_PATHWAY	hsa04728:Dopaminergic synapse	16	1.63265	0.00609785	DDC, CALY, KIF5A, DRD2, GNAI1, TH, MAPK11, GNG12, PRKCB, GNG8, SLC18A2, CAMK2B, SLC18A1, PRKACB, CACNA1D, PPP2R2C	396	128	6910	2.18119	0.791085	0.177765
KEGG_PATHWAY	hsa01130:Biosynthesis of antibiotics	22	2.2449	0.00941905	LDHB, ODC1, SHMT2, LDHA, ASS1, FAXDC2, ALDOC, HK2, AK5, TKT, ALDH3A2, CMBL, NME4, PYCR1, NME1-NME2, NME1, ATIC, PHGDH, PLA2G7, PSAT1, PAICS, CBS	396	212	6910	1.8108	0.911318	0.236001
KEGG_PATHWAY	hsa03410:Base excision repair	7	0.714286	0.00997565	POLE2, UNG, POLD1, NEIL3, PCNA, APEX1, FEN1	396	33	6910	3.70141	0.923203	0.226368
KEGG_PATHWAY	hsa04115:p53 signaling pathway	10	1.02041	0.0133503	CCNB1, CDK1, CDKN2A, CCNB2, RRM2, MDM2, CHEK1, CHEK2, CDK4, GTSE1	396	67	6910	2.6044	0.967958	0.268597
KEGG_PATHWAY	hsa05030:Cocaine addiction	8	0.816327	0.0203063	DDC, GNAI1, DRD2, TH, SLC18A2, PRKACB, SLC18A1, RGS9	396	49	6910	2.8489	0.994763	0.354455
KEGG_PATHWAY	hsa04727:GABAergic synapse	11	1.12245	0.0224289	SLC38A5, GNG8, GABRG2, ADCY1, GABARAPL1, GNAI1, GABBR1, PRKACB, GNG12, CACNA1D, PRKCB	396	85	6910	2.25817	0.996994	0.360267
KEGG_PATHWAY	hsa00670:One carbon pool by folate	5	0.510204	0.0245631	MTHFD2, TYMS, SHMT2, DHFR, ATIC	396	20	6910	4.36237	0.998282	0.365401
KEGG_PATHWAY	hsa05214:Glioma	9	0.918367	0.030816	E2F1, E2F3, CDKN2A, PIK3CD, PDGFRA, MDM2, CAMK2B, CDK4, PRKCB	396	65	6910	2.41608	0.999669	0.413863
KEGG_PATHWAY	hsa05031:Amphetamine addiction	9	0.918367	0.0333908	DDC, ARC, TH, SLC18A2, CAMK2B, PRKACB, SLC18A1, CACNA1D, PRKCB	396	66	6910	2.37948	0.999832	0.419216
KEGG_PATHWAY	hsa05143:African trypanosomiasis	6	0.612245	0.0376543	VCAM1, LAMA4, IL18, HBA1, HBB, PRKCB	396	33	6910	3.17264	0.999946	0.43897
KEGG_PATHWAY	hsa04068:FoxO signaling pathway	14	1.42857	0.0421403	GABARAPL1, PIK3CD, PRKAG2, FOXO1, MAPK11, IL7R, STAT3, CCNB1, PLK4, CCNB2, INS, PLK1, MDM2, BCL6	396	134	6910	1.82308	0.999984	0.45791
KEGG_PATHWAY	hsa04725:Cholinergic synapse	12	1.22449	0.0516576	GNG8, ADCY1, ACHE, KCNQ3, GNAI1, PIK3CD, CHRNB4, CAMK2B, PRKACB, GNG12, CACNA1D, PRKCB	396	111	6910	1.88643	0.999999	0.510632
KEGG_PATHWAY	hsa04066:HIF-1 signaling pathway	11	1.12245	0.0524741	PDK1, EIF4EBP1, INS, PIK3CD, TEK, HK2, MKNK1, CAMK2B, RPS6, STAT3, PRKCB	396	98	6910	1.95862	0.999999	0.49839
KEGG_PATHWAY	hsa04911:Insulin secretion	10	1.02041	0.0526671	ADCY1, ATP1B1, ATP1B2, INS, CAMK2B, PRKACB, VAMP2, CACNA1D, PRKCB, ADCYAP1	396	85	6910	2.05288	0.999999	0.482922
KEGG_PATHWAY	hsa04514:Cell adhesion molecules (CAMs)	14	1.42857	0.061831	CADM3, MPZ, PTPRF, CADM1, CDH3, HLA-DQA2, HLA-DQA1, SDC3, VCAM1, NRCAM, ALCAM, CNTN1, CNTNAP2, NEGR1	396	142	6910	1.72037	1	0.524169
KEGG_PATHWAY	hsa04723:Retrograde endocannabinoid signaling	11	1.12245	0.0620342	GNG8, GABRG2, ADCY1, GNAI1, CNR1, MAPK11, PRKACB, GNG12, CACNA1D, RIMS1, PRKCB	396	101	6910	1.90044	1	0.509737
KEGG_PATHWAY	hsa00230:Purine metabolism	16	1.63265	0.0778343	ADCY1, AK5, POLA2, GMPS, PDE6G, NME4, POLE2, NME1-NME2, NME1, ATIC, RRM2, POLD1, RRM1, ENTPD3, PAICS, IMPDH2	396	176	6910	1.58632	1	0.578664
KEGG_PATHWAY	hsa03460:Fanconi anemia pathway	7	0.714286	0.0801576	BLM, FANCI, EME1, BRIP1, RMI2, UBE2T, RAD51	396	53	6910	2.30465	1	0.574964
KEGG_PATHWAY	hsa03440:Homologous recombination	5	0.510204	0.0807525	XRCC2, BLM, POLD1, EME1, RAD51	396	29	6910	3.00853	1	0.563534
KEGG_PATHWAY	hsa05223:Non-small cell lung cancer	7	0.714286	0.0985911	E2F1, E2F3, CDKN2A, PIK3CD, CDK4, ALK, PRKCB	396	56	6910	2.18119	1	0.626241

## Sheet: Tophat
Category	Term	Count	%	PValue	Genes	List Total	Pop Hits	Pop Total	Fold Enrichment	Bonferroni	Benjamini
KEGG_PATHWAY	hsa03010:Ribosome	60	6.1287	1.47645e-34	RPL18, RPL36A, RPL14, RPL13, RPLP2, RPL22L1, RPS2, RPS3, RPS3A, RPLP0, RPLP1, RPL10, RPL12, RPL35A, MRPL3, RPS4X, RPS18, RPS19, RPS16, RPL41, RPS17, RPS14, RPS15, RPS4Y1, RPS13, RPS10, RPS11, RPL35, RPL27A, RPS15A, RPL36, RPL37, RPL38, RPL39, MRPL11, RPS25, RPS27, RPS28, RPS29, RPL32, RPL31, RPL34, RPL9, RPL5, RPL7A, RPS20, RPS21, RPS23, RPS24, RPSA, RPS9, RPL24, RPS6, RPS5, RPL28, RPS7, RPL29, R…	460	136	6910	6.62724	3.79447e-32	3.79447e-32
KEGG_PATHWAY	hsa05166:HTLV-I infection	51	5.2094	1.73269e-12	E2F1, E2F3, ADCY1, SPI1, NFKB2, PTTG1, HLA-DMB, HLA-DMA, WNT4, CDKN2A, MYB, ZFP36, ICAM1, EGR2, CD3D, SLC25A5, CD3E, RAN, SLC25A6, PIK3CD, HLA-C, HLA-B, CDK4, HLA-E, HLA-DQA2, HLA-DQA1, HLA-F, MAD2L1, LCK, BUB1B, HLA-DPA1, HLA-DRA, HLA-DQB1, ITGAL, HLA-DRB1, ITGB2, CHEK1, CHEK2, MYBL2, VCAM1, POLE2, HLA-DRB5, IL2RG, PIK3R5, HLA-DPB1, IL2RB, TGFBR2, CDC20, FZD5, POLD1, PCNA	460	256	6910	2.99261	4.4531e-10	2.22655e-10
KEGG_PATHWAY	hsa04514:Cell adhesion molecules (CAMs)	35	3.57508	2.35202e-11	HLA-DQB1, ITGAL, CADM3, HLA-DRB1, ITGB2, HLA-DMB, HLA-DMA, ITGAM, NRCAM, ALCAM, VCAM1, ITGB7, CD2, CNTNAP2, HLA-DRB5, CD4, HLA-DPB1, CD6, SELPLG, SPN, ICAM1, PTPRC, MPZ, PTPRF, SELL, HLA-C, HLA-B, HLA-E, HLA-DQA2, HLA-DQA1, HLA-F, CD86, ITGA8, HLA-DPA1, HLA-DRA	460	142	6910	3.70254	6.04469e-09	2.0149e-09
KEGG_PATHWAY	hsa04110:Cell cycle	31	3.1665	2.79164e-10	E2F1, E2F3, DBF4, PKMYT1, TTK, CHEK1, PTTG1, CHEK2, CDC45, CDKN2A, BUB1, ORC6, CCNA2, CDC6, CDK1, SKP2, ESPL1, CDC20, MCM2, CDK4, CDC25C, MCM3, CDC25A, MCM5, MCM6, CCNB1, MAD2L1, CCNB2, PLK1, PCNA, BUB1B	460	124	6910	3.75543	7.17452e-08	1.79363e-08
KEGG_PATHWAY	hsa05416:Viral myocarditis	20	2.0429	1.75083e-09	HLA-DQB1, ICAM1, ITGAL, HLA-DRB1, HLA-C, ITGB2, HLA-B, HLA-DMB, HLA-E, HLA-DMA, HLA-DQA2, HLA-DQA1, HLA-F, CD86, RAC2, CASP8, HLA-DRB5, HLA-DPA1, HLA-DPB1, HLA-DRA	460	57	6910	5.27079	4.49964e-07	8.99927e-08
KEGG_PATHWAY	hsa05150:Staphylococcus aureus infection	19	1.94076	4.72858e-09	HLA-DQB1, ICAM1, ITGAL, HLA-DRB1, FPR3, C1R, ITGB2, C1S, HLA-DMB, HLA-DMA, HLA-DQA2, ITGAM, HLA-DQA1, HLA-DRB5, HLA-DPA1, HLA-DPB1, SELPLG, PTAFR, HLA-DRA	460	54	6910	5.28543	1.21524e-06	2.02541e-07
KEGG_PATHWAY	hsa05332:Graft-versus-host disease	15	1.53218	6.80514e-09	HLA-DQB1, HLA-DRB1, HLA-C, HLA-B, HLA-DMB, HLA-E, HLA-DMA, HLA-DQA2, HLA-DQA1, HLA-F, CD86, HLA-DRB5, HLA-DPA1, HLA-DPB1, HLA-DRA	460	33	6910	6.82806	1.74892e-06	2.49846e-07
KEGG_PATHWAY	hsa04940:Type I diabetes mellitus	16	1.63432	3.21026e-08	HLA-DQB1, HLA-DRB1, HLA-C, HLA-B, HLA-DMB, HLA-E, HLA-DMA, HLA-DQA2, HLA-DQA1, HLA-F, CD86, HLA-DRB5, HLA-DPA1, HSPD1, HLA-DPB1, HLA-DRA	460	42	6910	5.72257	8.25034e-06	1.0313e-06
KEGG_PATHWAY	hsa05330:Allograft rejection	15	1.53218	3.96254e-08	HLA-DQB1, HLA-DRB1, HLA-C, HLA-B, HLA-DMB, HLA-E, HLA-DMA, HLA-DQA2, HLA-DQA1, HLA-F, CD86, HLA-DRB5, HLA-DPA1, HLA-DPB1, HLA-DRA	460	37	6910	6.08989	1.01837e-05	1.13153e-06
KEGG_PATHWAY	hsa04612:Antigen processing and presentation	20	2.0429	3.21079e-07	HLA-DQB1, CIITA, HLA-DRB1, HLA-C, HLA-B, CTSS, HLA-DMB, HLA-E, HLA-DMA, HLA-DQA2, CD74, HLA-DQA1, HLA-F, TAP1, HSPA6, HLA-DRB5, CD4, HLA-DPA1, HLA-DPB1, HLA-DRA	460	76	6910	3.95309	8.25138e-05	8.25169e-06
KEGG_PATHWAY	hsa05323:Rheumatoid arthritis	21	2.14505	8.26454e-07	HLA-DQB1, ICAM1, ITGAL, CCL2, HLA-DRB1, CSF1, IL18, ITGB2, HLA-DMB, CCL5, HLA-DMA, HLA-DQA2, CXCL12, HLA-DQA1, CD86, TNFSF13B, HLA-DRB5, HLA-DPA1, HLA-DPB1, LTB, HLA-DRA	460	88	6910	3.58473	0.000212376	1.93088e-05
KEGG_PATHWAY	hsa05320:Autoimmune thyroid disease	15	1.53218	4.54496e-06	HLA-DQB1, HLA-DRB1, HLA-C, HLA-B, HLA-DMB, HLA-E, HLA-DMA, HLA-DQA2, HLA-DQA1, HLA-F, CD86, HLA-DRB5, HLA-DPA1, HLA-DPB1, HLA-DRA	460	52	6910	4.33319	0.00116737	9.73333e-05
KEGG_PATHWAY	hsa05340:Primary immunodeficiency	12	1.22574	6.95902e-06	CIITA, PTPRC, CD3D, CD3E, UNG, LCK, TAP1, ZAP70, IL2RG, CD4, IL7R, BTK	460	34	6910	5.30179	0.00178688	0.000137565
KEGG_PATHWAY	hsa04672:Intestinal immune network for IgA production	14	1.43003	7.21244e-06	HLA-DQB1, HLA-DRB1, HLA-DMB, HLA-DMA, CXCL12, HLA-DQA2, HLA-DQA1, CD86, TNFSF13B, ITGB7, HLA-DRB5, HLA-DPA1, HLA-DPB1, HLA-DRA	460	47	6910	4.47456	0.00185189	0.000132392
KEGG_PATHWAY	hsa03030:DNA replication	11	1.1236	8.01218e-05	RFC4, POLE2, POLD1, PCNA, MCM2, POLA2, MCM3, RNASEH2A, MCM5, FEN1, MCM6	460	36	6910	4.58998	0.0203815	0.00137187
KEGG_PATHWAY	hsa05310:Asthma	10	1.02145	9.46322e-05	HLA-DQB1, HLA-DRB1, HLA-DRB5, HLA-DPA1, HLA-DPB1, HLA-DMB, HLA-DMA, HLA-DQA2, HLA-DQA1, HLA-DRA	460	30	6910	5.00725	0.0240282	0.00151895
KEGG_PATHWAY	hsa04145:Phagosome	24	2.45148	0.000171077	DYNC1I1, HLA-DQB1, HLA-DRB1, HLA-C, ITGB2, C1R, HLA-B, CTSS, HLA-DMB, HLA-E, HLA-DMA, HLA-DQA2, ITGAM, HLA-DQA1, HLA-F, CYBB, CD209, TAP1, HLA-DRB5, TUBA4A, HLA-DPA1, CLEC7A, HLA-DPB1, HLA-DRA	460	153	6910	2.35635	0.0430178	0.00258315
KEGG_PATHWAY	hsa05164:Influenza A	25	2.55363	0.000467845	HLA-DQB1, IFIH1, CCL2, HLA-DRB1, IL18, IL33, HLA-DMB, CCL5, HLA-DMA, NXT2, HSPA6, HLA-DRB5, PIK3R5, HLA-DPB1, CASP1, CIITA, ICAM1, PIK3CD, HLA-DQA2, HLA-DQA1, PRKCB, TNFSF10, TNFRSF10B, HLA-DPA1, HLA-DRA	460	174	6910	2.1583	0.113314	0.00665908
KEGG_PATHWAY	hsa05152:Tuberculosis	25	2.55363	0.000602418	HLA-DQB1, CIITA, HLA-DRB1, IL18, ITGB2, CTSS, HLA-DMB, HLA-DMA, HLA-DQA2, ITGAM, CD74, HLA-DQA1, ITGAX, IL10RA, CD209, CASP8, HLA-DRB5, CAMK2B, HLA-DPA1, CLEC7A, HSPD1, HLA-DPB1, CAMK2A, SYK, HLA-DRA	460	177	6910	2.12171	0.143472	0.00811782
KEGG_PATHWAY	hsa05168:Herpes simplex infection	25	2.55363	0.000975815	HLA-DQB1, IFIH1, CCL2, HLA-DRB1, HLA-DMB, CCL5, HLA-DMA, CD74, TAP1, CASP8, HLA-DRB5, HLA-DPB1, CDK1, SP100, ALYREF, SKP2, HLA-C, TNFRSF14, HLA-B, HLA-E, HLA-DQA2, HLA-DQA1, HLA-F, HLA-DPA1, HLA-DRA	460	183	6910	2.05215	0.221905	0.012467
KEGG_PATHWAY	hsa04650:Natural killer cell mediated cytotoxicity	19	1.94076	0.00107052	ICAM1, ITGAL, CD247, PIK3CD, KLRK1, ITGB2, VAV1, PRKCB, HCST, CD48, TNFSF10, TNFRSF10B, RAC2, ULBP2, LCK, ZAP70, PIK3R5, SYK, LCP2	460	122	6910	2.33945	0.240633	0.0130226
KEGG_PATHWAY	hsa04640:Hematopoietic cell lineage	15	1.53218	0.00128921	CD37, CD3D, HLA-DRB1, CD3E, CD33, CSF1, CD2, HLA-DRB5, CD4, KIT, IL7R, ITGAM, CSF1R, HLA-DRA, CD7	460	85	6910	2.6509	0.282184	0.0149571
KEGG_PATHWAY	hsa05145:Toxoplasmosis	18	1.83861	0.00190412	CIITA, HLA-DQB1, HLA-DRB1, PIK3CD, HLA-DMB, BIRC3, HLA-DMA, HLA-DQA2, HLA-DQA1, LAMA4, IL10RA, CASP8, HSPA6, HLA-DRB5, PIK3R5, HLA-DPA1, HLA-DPB1, HLA-DRA	460	118	6910	2.29145	0.387267	0.0210716
KEGG_PATHWAY	hsa05321:Inflammatory bowel disease (IBD)	12	1.22574	0.00295148	HLA-DQB1, HLA-DRB1, IL18, HLA-DRB5, IL2RG, HLA-DPA1, HLA-DPB1, HLA-DMB, HLA-DMA, HLA-DQA2, HLA-DQA1, HLA-DRA	460	64	6910	2.81658	0.532171	0.0311565
KEGG_PATHWAY	hsa05322:Systemic lupus erythematosus	19	1.94076	0.00313036	HLA-DQB1, C7, HLA-DRB1, HIST1H2BH, SNRPD1, C1R, C1S, HLA-DMB, HLA-DMA, HLA-DQA2, HLA-DQA1, CD86, SNRPB, H2AFZ, HLA-DRB5, H2AFX, HLA-DPA1, HLA-DPB1, HLA-DRA	460	134	6910	2.12995	0.553254	0.0317167
KEGG_PATHWAY	hsa04064:NF-kappa B signaling pathway	14	1.43003	0.00457886	ICAM1, CCL19, NFKB2, BIRC3, CXCL12, BTK, VCAM1, TNFSF13B, CCL21, LCK, ZAP70, TNFAIP3, LTB, SYK	460	87	6910	2.41729	0.692558	0.0443506
KEGG_PATHWAY	hsa05140:Leishmaniasis	12	1.22574	0.00668674	HLA-DQB1, HLA-DRB1, HLA-DRB5, HLA-DPA1, ITGB2, HLA-DPB1, HLA-DMB, HLA-DMA, HLA-DQA2, ITGAM, HLA-DQA1, HLA-DRA	460	71	6910	2.53889	0.821696	0.0618652
KEGG_PATHWAY	hsa04666:Fc gamma R-mediated phagocytosis	13	1.32789	0.00906033	PLD2, PTPRC, HCK, PIK3CD, WAS, VAV1, AMPH, PRKCB, DOCK2, RAC2, PIK3R5, INPP5D, SYK	460	84	6910	2.32479	0.903587	0.0801456
KEGG_PATHWAY	hsa04914:Progesterone-mediated oocyte maturation	13	1.32789	0.0118844	CCNB1, CDK1, ADCY1, MAD2L1, CCNB2, PLK1, PIK3CD, BUB1, PKMYT1, PIK3R5, CDC25C, CCNA2, CDC25A	460	87	6910	2.24463	0.953699	0.100532
KEGG_PATHWAY	hsa04114:Oocyte meiosis	15	1.53218	0.0126762	CDK1, ADCY1, PKMYT1, CDC20, ESPL1, AURKA, PTTG1, CDC25C, MAD2L1, PLK1, FBXO43, BUB1, FBXO5, CAMK2B, CAMK2A	460	109	6910	2.06721	0.96232	0.103527
KEGG_PATHWAY	hsa05144:Malaria	9	0.919305	0.0144244	VCAM1, ICAM1, ITGAL, CCL2, IL18, KLRK1, ITGB2, HBA1, HBB	460	49	6910	2.75909	0.976105	0.113482
KEGG_PATHWAY	hsa00240:Pyrimidine metabolism	14	1.43003	0.0196809	NT5C1A, UPP1, POLA2, TK1, NME4, TYMS, POLE2, NME1-NME2, NME1, POLD1, RRM2, RRM1, DPYD, DCTPP1	460	104	6910	2.02216	0.993954	0.147548
KEGG_PATHWAY	hsa03410:Base excision repair	7	0.715015	0.0198433	POLE2, UNG, POLD1, NEIL3, PCNA, APEX1, FEN1	460	33	6910	3.18643	0.994206	0.144519
KEGG_PATHWAY	hsa05143:African trypanosomiasis	7	0.715015	0.0198433	VCAM1, ICAM1, LAMA4, IL18, HBA1, HBB, PRKCB	460	33	6910	3.18643	0.994206	0.144519
KEGG_PATHWAY	hsa05134:Legionellosis	9	0.919305	0.0249491	IL18, CASP8, HSPA6, EEF1G, ITGB2, HSPD1, NFKB2, CASP1, ITGAM	460	54	6910	2.50362	0.998486	0.173849
KEGG_PATHWAY	hsa05212:Pancreatic cancer	10	1.02145	0.0268534	E2F1, E2F3, CDKN2A, RAC2, ARHGEF6, PIK3CD, TGFBR2, PIK3R5, CDK4, RAD51	460	65	6910	2.31104	0.999084	0.181168
KEGG_PATHWAY	hsa04060:Cytokine-cytokine receptor interaction	24	2.45148	0.0312106	IL2RB, CCL2, TNFRSF25, CSF1, IL18, TGFBR2, CCL19, TNFRSF14, KIT, IL7R, CCL5, CXCL12, TNFRSF1B, CCR7, TNFSF10, TNFSF13B, CCL21, IL10RA, CSF2RB, IL2RG, IL13RA1, BMP7, LTB, CSF1R	460	230	6910	1.56749	0.999711	0.202569
KEGG_PATHWAY	hsa04068:FoxO signaling pathway	16	1.63432	0.0317277	SGK1, GABARAPL1, SGK2, TGFBR2, PIK3CD, SKP2, FOXO1, IL7R, CCNB1, PLK4, TNFSF10, CCNB2, PLK1, BCL6, PIK3R5, KLF2	460	134	6910	1.79364	0.999748	0.200646
KEGG_PATHWAY	hsa04115:p53 signaling pathway	10	1.02145	0.0319856	CCNB1, CDK1, CDKN2A, CCNB2, RRM2, CASP8, CHEK1, CHEK2, CDK4, GTSE1	460	67	6910	2.24205	0.999765	0.197368
KEGG_PATHWAY	hsa00270:Cysteine and methionine metabolism	7	0.715015	0.0374609	TST, LDHB, LDHA, AHCY, IL4I1, CBS, MPST	460	38	6910	2.76716	0.999945	0.222445
KEGG_PATHWAY	hsa00670:One carbon pool by folate	5	0.510725	0.039795	MTHFD2, TYMS, SHMT2, DHFR, ATIC	460	20	6910	3.75543	0.999971	0.229649
KEGG_PATHWAY	hsa03440:Homologous recombination	6	0.61287	0.0399798	XRCC2, BLM, POLD1, EME1, RAD54L, RAD51	460	29	6910	3.10795	0.999972	0.225666
KEGG_PATHWAY	hsa01130:Biosynthesis of antibiotics	22	2.24719	0.0418629	ODC1, LDHB, SHMT2, LDHA, ASS1, FAXDC2, ALDOC, HK2, AK5, TKT, PPAT, CMBL, NME4, PYCR1, NME1-NME2, NME1, ATIC, PHGDH, PLA2G7, PSAT1, PAICS, CBS	460	212	6910	1.55886	0.999983	0.230241
KEGG_PATHWAY	hsa05169:Epstein-Barr virus infection	20	2.0429	0.0472734	ICAM1, ITGAL, CDK1, FGR, RAN, PIK3CD, SKP2, SPI1, HLA-C, NFKB2, HLA-B, HLA-E, HLA-F, IL10RA, HSPA6, PIK3R5, TNFAIP3, CCNA2, SPN, SYK	460	190	6910	1.58124	0.999996	0.251315
KEGG_PATHWAY	hsa04210:Apoptosis	9	0.919305	0.0513154	TNFSF10, TNFRSF10B, NTRK1, ENDOG, PIK3CD, CASP8, CSF2RB, PIK3R5, BIRC3	460	62	6910	2.18058	0.999999	0.264859
KEGG_PATHWAY	hsa04380:Osteoclast differentiation	15	1.53218	0.0517141	CSF1, TGFBR2, PIK3CD, SPI1, FOSB, NFKB2, BTK, LILRB1, CYBB, LILRB4, LCK, PIK3R5, SYK, LCP2, CSF1R	460	131	6910	1.72005	0.999999	0.26159
KEGG_PATHWAY	hsa03460:Fanconi anemia pathway	8	0.81716	0.0595053	BLM, FANCI, EME1, BRIP1, RMI2, BRCA1, UBE2T, RAD51	460	53	6910	2.26743	1	0.290188
KEGG_PATHWAY	hsa05214:Glioma	9	0.919305	0.0646083	E2F1, E2F3, CDKN2A, PIK3CD, CAMK2B, PIK3R5, CDK4, CAMK2A, PRKCB	460	65	6910	2.07993	1	0.305951
KEGG_PATHWAY	hsa04621:NOD-like receptor signaling pathway	8	0.81716	0.0700602	CCL2, IL18, CASP8, PSTPIP1, CCL5, BIRC3, TNFAIP3, CASP1	460	55	6910	2.18498	1	0.3222
KEGG_PATHWAY	hsa05223:Non-small cell lung cancer	8	0.81716	0.0757305	E2F1, E2F3, CDKN2A, PIK3CD, PIK3R5, CDK4, ALK, PRKCB	460	56	6910	2.14596	1	0.338367
KEGG_PATHWAY	hsa04660:T cell receptor signaling pathway	12	1.22574	0.0789528	PTPRC, CD3D, CD3E, PIK3CD, CD247, LCK, ZAP70, CD4, PIK3R5, CDK4, VAV1, LCP2	460	103	6910	1.75011	1	0.344747
KEGG_PATHWAY	hsa04664:Fc epsilon RI signaling pathway	9	0.919305	0.0798577	RAC2, PIK3CD, PIK3R5, INPP5D, VAV1, PRKCB, SYK, BTK, LCP2	460	68	6910	1.98817	1	0.342558
KEGG_PATHWAY	hsa04670:Leukocyte transendothelial migration	13	1.32789	0.0913838	VCAM1, ICAM1, ITGAL, CYBB, RAC2, MMP9, PIK3CD, ITGB2, PIK3R5, CXCL12, VAV1, ITGAM, PRKCB	460	118	6910	1.65494	1	0.377265
KEGG_PATHWAY	hsa04668:TNF signaling pathway	12	1.22574	0.0924497	VCAM1, ICAM1, TNFRSF1B, CCL2, CSF1, MMP9, PIK3CD, CASP8, PIK3R5, CCL5, BIRC3, TNFAIP3	460	106	6910	1.70057	1	0.375241

## Sheet: Chimerascan
Category	Term	Count	%	PValue	Genes	List Total	Pop Hits	Pop Total	Fold Enrichment	Bonferroni	Benjamini
KEGG_PATHWAY	hsa03010:Ribosome	67	6.83673	8.37985e-45	RPL18, RPL17, RPL36A, RPL14, RPL13, RPLP2, RPL22L1, RPS2, RPS3, RPS3A, RPLP0, RPLP1, RPL10, RPL12, RPL35A, MRPL3, RPS4X, RPS18, RPS19, RPS16, RPL41, RPS17, RPS14, RPS15, RPS4Y1, RPS13, RPS10, RPS11, UBA52, RPL35, RPL27A, RPS15A, RPL36, RPL37, RPL38, RPL39, RPS25, MRPL11, RPS27, RPS28, MRPL12, RPS29, RPL32, RPL31, RPL34, RPL9, RPL5, RPS20, RPL7A, RPS21, RPS23, RPS24, RPSA, RPS9, RPL27, RPL24, RPS6…	425	136	6910	8.00986	2.10334e-42	2.10334e-42
KEGG_PATHWAY	hsa04110:Cell cycle	28	2.85714	4.66127e-09	E2F1, E2F3, DBF4, PKMYT1, TTK, CHEK1, PTTG1, CHEK2, CDC45, CDKN2A, BUB1, ORC6, CCNA2, CDK1, CDC20, ESPL1, MCM2, CDK4, CDC25C, CDC25A, MCM5, MCM6, CCNB1, MAD2L1, CCNB2, PLK1, PCNA, BUB1B	425	124	6910	3.67135	1.16998e-06	5.84989e-07
KEGG_PATHWAY	hsa05166:HTLV-I infection	35	3.57143	1.35948e-05	E2F1, ITGAL, E2F3, ADCY1, CHEK1, NFKB2, PTTG1, CHEK2, MYBL2, VCAM1, WNT4, CDKN2A, POLE2, RANBP1, PIK3R5, IL2RG, ZFP36, ICAM1, IL2RB, SLC25A5, SLC25A6, PIK3CD, TGFBR2, CDC20, FZD2, CDK4, HLA-DQA2, HLA-DQA1, MAD2L1, POLD1, PCNA, PDGFRA, BUB1B, HLA-DPA1, HLA-DRA	425	256	6910	2.22289	0.00340651	0.00113679
KEGG_PATHWAY	hsa03030:DNA replication	10	1.02041	0.000240861	RFC4, POLE2, POLD1, PCNA, MCM2, POLA2, RNASEH2A, MCM5, FEN1, MCM6	425	36	6910	4.51634	0.0586718	0.0150022
KEGG_PATHWAY	hsa04514:Cell adhesion molecules (CAMs)	20	2.04082	0.00101221	ICAM1, ITGAL, PTPRC, CADM3, MPZ, PTPRF, CADM1, HLA-DQA2, HLA-DQA1, SDC3, ALCAM, NRCAM, VCAM1, CD2, CNTNAP2, CD4, CNTNAP1, HLA-DPA1, CD6, HLA-DRA	425	142	6910	2.28998	0.224459	0.0495681
KEGG_PATHWAY	hsa04914:Progesterone-mediated oocyte maturation	14	1.42857	0.00230696	CCNB1, CDK1, ADCY1, MAD2L1, CCNB2, INS, PLK1, PIK3CD, BUB1, PKMYT1, PIK3R5, CDC25C, CCNA2, CDC25A	425	87	6910	2.61636	0.439943	0.0920985
KEGG_PATHWAY	hsa03410:Base excision repair	7	0.714286	0.0138576	POLE2, UNG, POLD1, NEIL3, PCNA, APEX1, FEN1	425	33	6910	3.44884	0.969881	0.393693
KEGG_PATHWAY	hsa05143:African trypanosomiasis	7	0.714286	0.0138576	VCAM1, ICAM1, LAMA4, IL18, HBA1, HBB, PRKCB	425	33	6910	3.44884	0.969881	0.393693
KEGG_PATHWAY	hsa04114:Oocyte meiosis	14	1.42857	0.0155472	CDK1, ADCY1, PKMYT1, CDC20, ESPL1, AURKA, PTTG1, CDC25C, MAD2L1, PLK1, INS, BUB1, FBXO5, CAMK2B	425	109	6910	2.08829	0.980415	0.388369
KEGG_PATHWAY	hsa05340:Primary immunodeficiency	7	0.714286	0.0159818	CIITA, PTPRC, UNG, ZAP70, IL2RG, CD4, IL7R	425	34	6910	3.3474	0.98247	0.361935
KEGG_PATHWAY	hsa04066:HIF-1 signaling pathway	13	1.32653	0.0162385	PDK1, EIF4EBP1, CYBB, INS, PIK3CD, TEK, HK2, MKNK1, CAMK2B, PIK3R5, RPS6, STAT3, PRKCB	425	98	6910	2.15678	0.983581	0.336968
KEGG_PATHWAY	hsa05212:Pancreatic cancer	10	1.02041	0.0169371	E2F1, E2F3, CDKN2A, ARHGEF6, PIK3CD, TGFBR2, PIK3R5, CDK4, STAT3, RAD51	425	65	6910	2.50136	0.986263	0.322797
KEGG_PATHWAY	hsa00240:Pyrimidine metabolism	13	1.32653	0.0248727	UPP1, POLA2, TK1, NME4, TYMS, POLE2, NME1-NME2, NME1, POLD1, RRM2, RRM1, DPYD, DCTPP1	425	104	6910	2.03235	0.998204	0.409528
KEGG_PATHWAY	hsa05144:Malaria	8	0.816327	0.028637	VCAM1, ICAM1, ITGAL, CCL2, IL18, KLRK1, HBA1, HBB	425	49	6910	2.6545	0.99932	0.429353
KEGG_PATHWAY	hsa00670:One carbon pool by folate	5	0.510204	0.0309134	MTHFD2, TYMS, SHMT2, DHFR, ATIC	425	20	6910	4.06471	0.999622	0.43049
KEGG_PATHWAY	hsa01130:Biosynthesis of antibiotics	21	2.14286	0.0354924	LDHB, ODC1, SHMT2, LDHA, ASS1, FAXDC2, ALDOC, HK2, AK5, TKT, CMBL, NME4, PYCR1, NME1-NME2, NME1, ATIC, PHGDH, PLA2G7, PSAT1, PAICS, CBS	425	212	6910	1.61054	0.999885	0.453763
KEGG_PATHWAY	hsa04612:Antigen processing and presentation	10	1.02041	0.0419492	CIITA, HSPA6, CD4, HLA-DPA1, CTSS, HLA-DQA2, CD74, HLA-DQA1, HLA-DRA, TAPBP	425	76	6910	2.13932	0.999979	0.489457
KEGG_PATHWAY	hsa05215:Prostate cancer	11	1.12245	0.0422257	E2F1, E2F3, INS, PIK3CD, PDGFRA, FOXO1, LEF1, PIK3R5, PDGFD, TCF7L2, INSRR	425	88	6910	2.03235	0.99998	0.471121
KEGG_PATHWAY	hsa05214:Glioma	9	0.918367	0.0440837	E2F1, E2F3, CDKN2A, PIK3CD, PDGFRA, CAMK2B, PIK3R5, CDK4, PRKCB	425	65	6910	2.25122	0.999988	0.466707
KEGG_PATHWAY	hsa05150:Staphylococcus aureus infection	8	0.816327	0.0455463	ICAM1, ITGAL, MASP2, HLA-DPA1, C1S, HLA-DQA2, HLA-DQA1, HLA-DRA	425	54	6910	2.40871	0.999992	0.459805
KEGG_PATHWAY	hsa05031:Amphetamine addiction	9	0.918367	0.0476005	DDC, ARC, TH, SLC18A2, CAMK2B, FOSB, SLC18A1, CACNA1D, PRKCB	425	66	6910	2.21711	0.999995	0.457774
KEGG_PATHWAY	hsa04115:p53 signaling pathway	9	0.918367	0.0512954	CCNB1, CDK1, CDKN2A, CCNB2, RRM2, CHEK1, CHEK2, CDK4, GTSE1	425	67	6910	2.18402	0.999998	0.467081
KEGG_PATHWAY	hsa05223:Non-small cell lung cancer	8	0.816327	0.05379	E2F1, E2F3, CDKN2A, PIK3CD, PIK3R5, CDK4, ALK, PRKCB	425	56	6910	2.32269	0.999999	0.467843
KEGG_PATHWAY	hsa04068:FoxO signaling pathway	14	1.42857	0.066802	GABARAPL1, PIK3CD, PRKAG2, TGFBR2, FOXO1, IL7R, STAT3, CCNB1, PLK4, CCNB2, INS, PLK1, PIK3R5, BCL6	425	134	6910	1.69868	1	0.529756
KEGG_PATHWAY	hsa04930:Type II diabetes mellitus	7	0.714286	0.0714657	PRKCZ, INS, PIK3CD, CACNA1G, HK2, PIK3R5, CACNA1D	425	48	6910	2.37108	1	0.53951
KEGG_PATHWAY	hsa05030:Cocaine addiction	7	0.714286	0.0774418	DDC, DRD2, TH, SLC18A2, FOSB, SLC18A1, RGS9	425	49	6910	2.32269	1	0.554818
KEGG_PATHWAY	hsa00270:Cysteine and methionine metabolism	6	0.612245	0.0805576	TST, LDHB, LDHA, AHCY, CBS, MPST	425	38	6910	2.56718	1	0.5555
KEGG_PATHWAY	hsa05323:Rheumatoid arthritis	10	1.02041	0.0892863	ICAM1, ITGAL, CCL2, IL18, TEK, HLA-DPA1, HLA-DQA2, HLA-DQA1, HLA-DRA, IL11	425	88	6910	1.84759	1	0.580819
KEGG_PATHWAY	hsa03440:Homologous recombination	5	0.510204	0.0987609	XRCC2, BLM, POLD1, EME1, RAD51	425	29	6910	2.80325	1	0.606293
